# Supplementary material for: Protective effects of ectoine on articular chondrocytes and cartilage in rats for treating osteoarthritis
Source: PLoS One. 2024 Feb 29;19(2):e0299351. doi: 10.1371/journal.pone.0299351 (PMC10903896; doi:10.1371/journal.pone.0299351)
Supplement: S1 Table — (XLSX) [file pone.0299351.s005.xlsx]

## Sheet: Sheet1
Control	0.5% Ec	1.0 % Ec	1.5% Ec
27.2648	65.5279	76.5279	94.3253
44.8663	70.6356	79.6356	91.6067
41.8683	62.1827	86.1819	88.9723
39.1982	64.8915	79.8915	87.2362
37.2767	74.675	93.675	83.0184
	cell viability at 50 ℃
